# Supplementary material for: Comparative Renal Effects of Dipeptidyl Peptidase-4 Inhibitors and Sodium-Glucose Cotransporter 2 Inhibitors on Individual Outcomes in Patients with Type 2 Diabetes: A Systematic Review and Network Meta-Analysis
Source: PubMed Central journal article supplement — Endocrinol Metab (Seoul). 2021 Mar 31;36(2):388–400. doi: 10.3803/EnM.2020.912 (PMC8090474; doi:10.3803/enm.2020.912), 2021-03-31
Supplement: enm-2020-912-suppl2.pdf [file enm-2020-912-suppl2.pdf]

**Supplemental Table S2.** Subgroup Analysis of End-Stage Kidney Disease in the Studies Longer than 52 Weeks

|                          | Placebo          | DPP-4<br>inhibitors | SGLT2<br>inhibitors |
|--------------------------|------------------|---------------------|---------------------|
| End-stage kidney disease |                  |                     |                     |
| Placebo                  | 1                |                     |                     |
| DPP-4 inhibitors         | 0.97 (0.74–1.34) | 1                   |                     |
| SGLT2 inhibitors         | 0.58 (0.38–0.81) | 0.60 (0.34–0.91)    | 1                   |

Values are expressed as median odds ratios (95% credible intervals).  
DPP-4, dipeptidyl peptidase-4; SGLT2, sodium-glucose cotransporter 2.
