# Supplementary material for: Comparative Renal Effects of Dipeptidyl Peptidase-4 Inhibitors and Sodium-Glucose Cotransporter 2 Inhibitors on Individual Outcomes in Patients with Type 2 Diabetes: A Systematic Review and Network Meta-Analysis
Source: PubMed Central journal article supplement — Endocrinol Metab (Seoul). 2021 Mar 31;36(2):388–400. doi: 10.3803/EnM.2020.912 (PMC8090474; doi:10.3803/enm.2020.912), 2021-03-31
Supplement: enm-2020-912-suppl7.pdf [file enm-2020-912-suppl7.pdf]

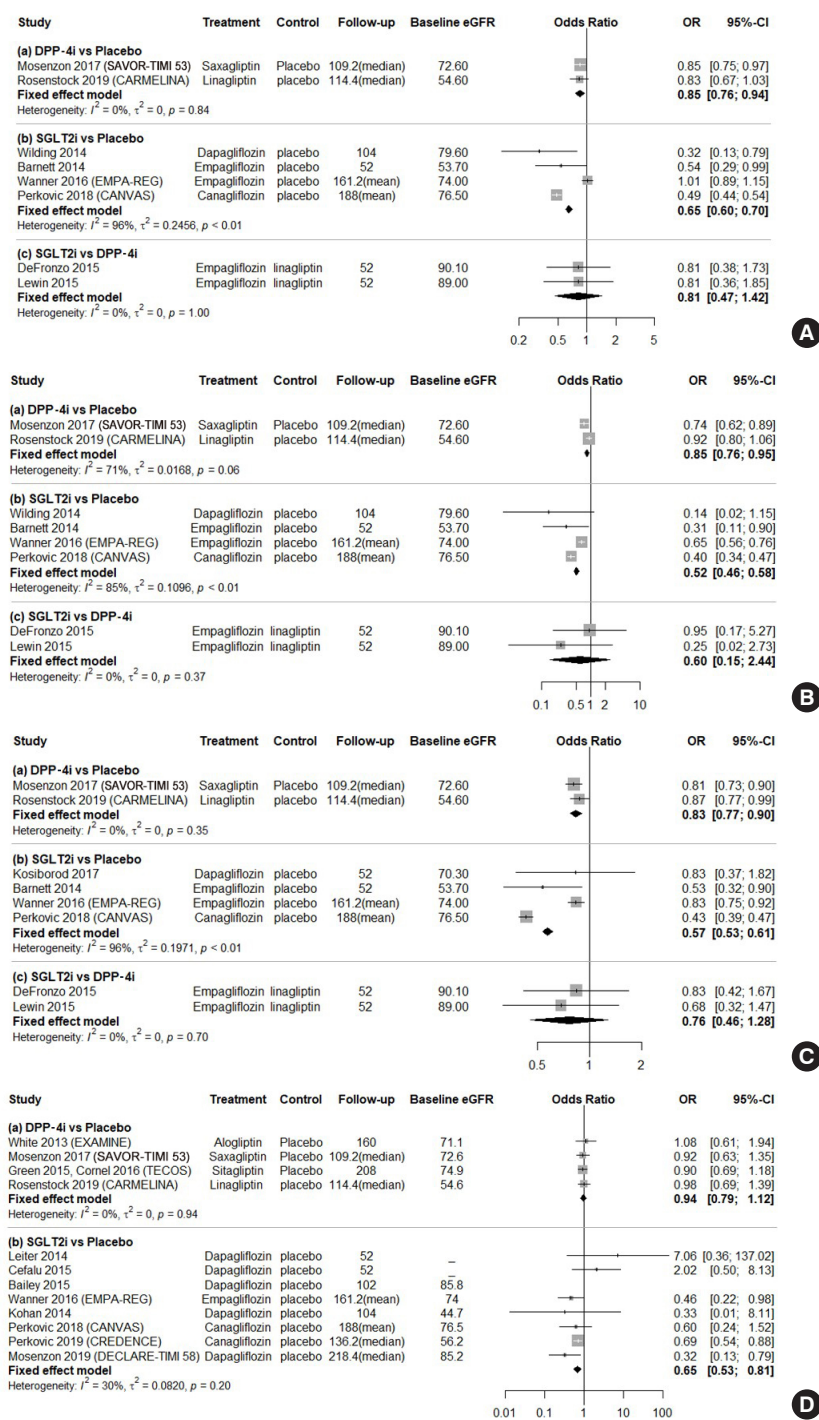

**Supplemental Fig. S3.** Pairwise meta-analyses using a fixed effect model for (A) microalbuminuria, (B) macroalbuminuria, (C) worsening nephropathy, and (D) end-stage kidney disease. eGFR, estimated glomerular filtration rate ( $\text{mL}/\text{min}/1.73 \text{ m}^2$ ); OR, odds ratio; CI, confidence interval; DPP-4i, dipeptidyl peptidase-4 inhibitor; SAVOR-TIMI 53, Saxagliptin Assessment of Vascular Outcomes Recorded in Patients With Diabetes Mellitus-Thrombolysis in Myocardial Infarction 53; CARMELINA, Cardiovascular and Renal Microvascular Outcome Study with Linagliptin; SGLT2i, sodium-glucose cotransporter 2 inhibitor; EMPA-REG, Empagliflozin Cardiovascular Outcome Event Trial in Type 2 Diabetes Mellitus Patients-Removing Excess Glucose; CANVAS, Canagliflozin Cardiovascular Assessment Study; EXAMINE, Examination of Cardiovascular Outcomes with Alogliptin versus Standard of Care; TECOS, Trial Evaluating Cardiovascular Outcomes with Sitagliptin; CREDENCE, Canagliflozin and Renal Events in Diabetes with Established Nephropathy Clinical Evaluation; DECLARE-TIMI 58, Dapagliflozin Effect on Cardiovascular Events-Thrombolysis in Myocardial Infarction 58.
